# Supplementary material for: Dual dye-loaded Au@Ag coupled to a lateral flow immunoassay for the accurate and sensitive detection of Mycoplasma pneumoniae infection
Source: Royal Society of Chemistry journal article supplement (doi:10.1039/c8ra03323d), 2018-01-01
Supplement: c8ra03323d1.pdf [file c8ra03323d1.pdf]

## Supplementary Information

### **Dual dye-loaded Au@Ag coupled to a lateral flow immunoassay for the accurate and sensitive detection of *Mycoplasma pneumonia* infection**

Xiaofei Jia,<sup>‡ab</sup> Chongwen Wang,<sup>‡ab</sup> Zhen Rong,<sup>‡b</sup> Jian Li,<sup>c</sup> Keli Wang,<sup>b</sup> Zhiwei Qie,<sup>b</sup> Rui Xiao<sup>\*b</sup>  
and Shengqi Wang<sup>\*ab</sup>

<sup>a</sup> College of Life Sciences & Bio-Engineering, Beijing University of Technology,  
Beijing 100124, PR China.

<sup>b</sup> Beijing Institute of Radiation Medicine, Beijing 100850, PR China.

<sup>c</sup> Chinese PLA General Hospital, Beijing 100853, PR China.

\* Corresponding authors. Tel: +86-10-66932211. E-mail: sqwang@bmi.ac.cn.

Tel: +86-10-66931422-5. E-mail: ruixiao203@sina.com.

† Electronic supplementary information (ESI) available.

‡ These authors contributed equally to this work.

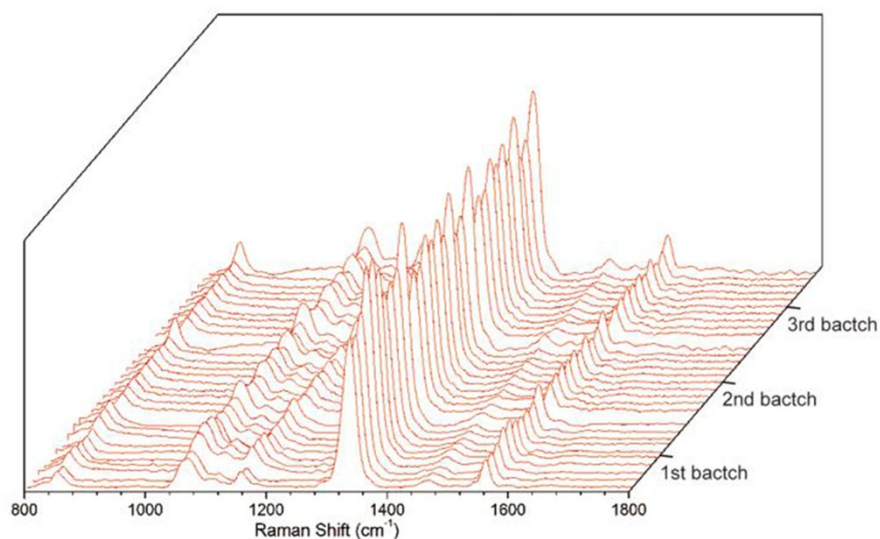

**Figure S1.** The repeatability of the proposed SERS-LFIA strips for human IgM detection (10 ng/mL). The SERS spectra collected randomly from 10 spots on the three different batches of SERS-LFIA strips.

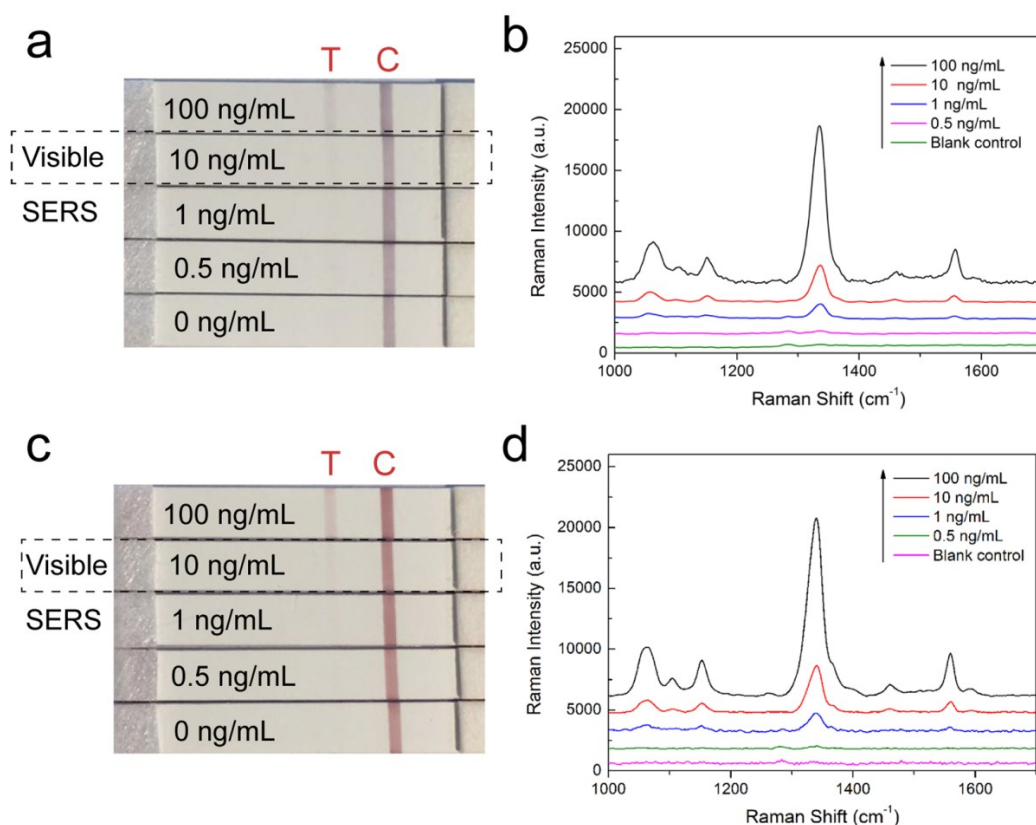

**Figure S2.** Photographs of the SERS-LFIA strips based on Au/DTNB (a) and Au@Ag/DTNB NPs (c) as the SERS tags after applying different concentrations of human IgM. (b) and (d) Corresponding SERS spectra obtained from the T line of (a) and (c), respectively. The integration times were 5 s and the excitation laser energy

was 10 mW.

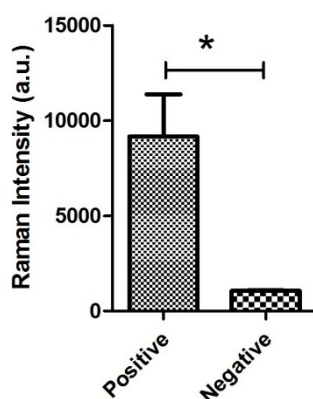

**Figure S3.** Comparison of positive group (20 MP-specific IgM positive serum specimens) and negative group (10 MP-specific IgM negative serum specimens) based on SERS-LFIA strips. \* $p < 0.05$ .

**Table S1.** Characteristics of the SERS-based LFIA strip developed in this work compared to other recently reported LFIA strip for respiratory pathogens detection.

| Strategy                         | Respiratory pathogen  | Limit of detection (LOD)               | Tested sample                   | Reference                    |
|----------------------------------|-----------------------|----------------------------------------|---------------------------------|------------------------------|
| Fluorescence                     | Influenza A (H1N1)    | 250 ng mL <sup>-1</sup>                | Allantoic fluid                 | Suwussa Bamrungsap et al     |
| Au NPs                           | Influenza A (H1N1)    | 47 TCID <sub>50</sub> mL <sup>-1</sup> | Influenza A infected MDCK cells | Natpapas Wiryachaiporn et al |
| Au NPs with silver amplification | Influenza A (H5N1)    | 0.5 ng mL <sup>-1</sup>                | Allantoic fluid                 | Atsuhiko Wada et al          |
| Quantum dot                      | Influenza A (H9N2)    | 0.25 HAU                               | Human serum                     | Feng Wu et al                |
| SERS                             | Influenza A (H1N1)    | 6.7 ng mL <sup>-1</sup>                | Allantoic fluid                 | Maneeprakorn et al           |
| SERS                             | Mycoplasma pneumoniae | 0.1 ng mL <sup>-1</sup>                | Human serum                     | This work                    |
